1 Development of a papillation assay using constitutive promoters to find  
2 hyperactive transposases

3

4 Michael Tellier<sup>2\*</sup> and Ronald Chalmers<sup>1\*</sup>

5

6 \*Corresponding authors: [michael.tellier@path.ox.ac.uk](mailto:michael.tellier@path.ox.ac.uk),

7 [ronald.chalmers@nottingham.ac.uk](mailto:ronald.chalmers@nottingham.ac.uk),

8

9 <sup>1</sup> School of Life Sciences, University of Nottingham, Queen's Medical Centre,  
10 Nottingham, NG7 2UH, UK

11 <sup>2</sup> Current address: Sir William Dunn School of Pathology, University of Oxford,  
12 Oxford, OX1 3RF, UK

13

14

15

16

17

18

19

20

21

22

23

24

25

26 **Abstract**

27 Background

28 Transposable elements is an extremely diverse group of genetic elements  
29 encoding their own mobility. This ability has been exploited as a powerful tool  
30 for molecular biology and genomics techniques. However, transposition  
31 activity is regulated by *cis* and/or *trans* mechanisms because of the need to  
32 co-exist with their host. This represents a limitation to their usage as  
33 biotechnological tools. The development of screening assays and the  
34 improvement of current ones is therefore needed to find hyperactive  
35 transposases.

36 Results

37 We present in this study an improvement of the well-known papillation assay  
38 where in place of an inducible promoter, we designed a set of constitutive  
39 promoters cloned into a one or five copies vector in presence or absence of a  
40 ribosome binding site. This set of vectors provides a wide range of  
41 transposase expression and offers a more uniform expression of the  
42 transposase across cells compared to inducible promoters. These constructs  
43 can therefore be used to screen for hyperactive transposases or for  
44 transposases resistant to overproduction inhibition, a mechanism affecting  
45 DNA transposases such as Hsmar1, which decreases the transposition rate  
46 when the transposase concentration increases. We characterized and  
47 validated our set of vectors with the Hsmar1 transposase and took advantage  
48 of our approach to investigate the effects on the transposition rate of inserting  
49 mutations in the Hsmar1 dimer interface or of covalently binding two Hsmar1  
50 monomer.

51 Conclusions

52 This improved papillation assay should be applicable to a wide variety of DNA  
53 transposases. It also provides a straightforward approach to screen  
54 transposase mutant libraries with a specific expression level to find  
55 hypoactive, hyperactive or overproduction inhibition resistant transposases.  
56 Our approach could also be useful for synthetic biology as a combination of  
57 the wild type or covalently bound Hsmar1 transposase with a library of weak  
58 promoters offers the possibility to find promoters expressing on average one  
59 or two proteins per cell.

60

61

62

63

64

65

66

67

68

69

70

71

72

73

74 Key words: transposon; transposase; overproduction inhibition; papillation

75 assay; Hsmar1

## 76 **Background**

77 Transposable elements (TEs) are DNA sequences encoding their own ability  
78 to move in a genome from one place to another. They are found in virtually all  
79 organisms and are particularly present in eukaryotes where they can  
80 represent a high percentage of the genome (1-3). Originally described as  
81 selfish elements due to their ability to replicate independently of their host,  
82 TEs have now been shown to be important drivers of genome evolution (4, 5).  
83 Indeed, TEs can provide novel transcription factors binding sites, promoters,  
84 exons or poly(A) sites and can also be co-opted as micro RNAs or long  
85 intergenic RNAs (6-8).  
86 TEs are therefore a diverse group of DNA sequences using a wide range of  
87 mechanisms to transpose inside and between hosts. For example, some DNA  
88 transposons like the *mariner* elements transpose through a “cut and paste”  
89 mechanism where a single copy of the transposon moves from one place to  
90 another without copying itself (9). Over the past several years, our group and  
91 others have described the mechanisms regulating the transposition rate of  
92 different DNA transposases, such as Hsmar1 or Mos1 (10-15). In Hsmar1, the  
93 central regulatory mechanism of transposition is overproduction inhibition  
94 (OPI) (16), a phenomenon emerging from the decreased binding affinity of a  
95 transposase dimer for the second end of the transposon after binding the first  
96 end (10). This decreased affinity increases the probability of another Hsmar1  
97 dimer to bind the free end, blocking transposition at the same time. Thus, OPI  
98 curbs the transposition of Hsmar1 to avoid an exponential transposition rate  
99 which would prove catastrophic for the host (12).

100 However, OPI represents a limitation in the development of hyperactive  
101 transposases, which are for example needed for transposon mutagenesis.  
102 Several approaches can be used to overcome OPI such as modifying the  
103 binding kinetics of the transposase to the ITR or the monomer-dimer  
104 equilibrium. Indeed, we and others previously shown that most mutations in  
105 the conserved WVPHEL motif in Himar1 and Hsmar1, which is involved in the  
106 subunit interface, result in hyperactive transposases but at the cost of  
107 producing nonproductive DNA double-strand breaks and therefore DNA  
108 damage (17, 18).

109 The discovery of hyperactive transposases in bacteria has mostly been  
110 accomplished by screening libraries of transposase mutants with the  
111 papillation assay (Supplementary Figure 1a) (19, 20). This assay is based on  
112 a promoter-less lacZ gene flanked by transposon ends. This reporter is  
113 integrated in a silent region of the genome of *Escherichia coli*. The  
114 transposase gene is provided *in trans* on a plasmid to simplify mutagenesis  
115 and library handling. Transposition events into an expressed ORF give rise to  
116 lacZ gene fusion proteins. When this happens within a colony growing on an  
117 X-gal indicator plate, it converts the cell to a lac+ phenotype, which allows the  
118 outgrowth of a blue microcolony (papillae) on a background of white cells. The  
119 transposition rate is given by the number of papillae per colony and by the  
120 rate of their appearance. The visual read-out of this assay simplifies the  
121 screening of mutant libraries for discovering hypo- or hyper-active  
122 transposases. The mating-out assay is a more quantitative assay using the  
123 same reporter strain. Here, the rate of transposition is measured by

124 movement of the reporter from its chromosomal location into a conjugative  
125 plasmid.  
126 In the current work, we present an improvement of the papillation assay by  
127 using a set of constitutive promoters cloned in a single or five copies vector in  
128 absence or presence of a ribosome binding site (RBS). This set of expression  
129 vectors allows us to express a transposase across a wide range of expression  
130 level facilitating the screening of hyperactive and/or OPI-resistant  
131 transposases. We used this set of vectors to compare an Hsmar1 monomer to  
132 a covalently bound Hsmar1 dimer and to test for hyperactivity and OPI-  
133 resistance several Hsmar1 mutants. We found that one Hsmar1 mutant in the  
134 dimer interface, R141L, is resistant to OPI in *E. coli*.

135

## 136 **Results**

### 137 **Characterization of the constitutive promoters**

138 The papillation assay provides a visual assessment of the transposition rate,  
139 which can be determined from the rate of papillae apparition and their number  
140 per colony (19). The transposition rate is dependent of the concentration and  
141 the activity of the transposase (12). Conventionally, transposition assays use  
142 inducible promoters which limits the accessible range of transposase  
143 expression and also result in cell-to-cell variability due to the unequal diffusion  
144 of the inducer in colonies. To overcome these limitations, we synthesized a  
145 set of five constitutive promoters (00, JJ, K, E, and W) based on (21). In  
146 addition, we created a null-expression vector by replacing the promoter and  
147 the RBS with a featureless, undistorted, DNA sequence consisting of a single  
148 repeat of the tetranucleotide (GACT)<sub>n=44</sub>. To increase the range of expression

149 levels obtainable, we also created a variant of each promoter where the RBS  
150 has been abolished. The expression construct is shown in Figure 1A and is  
151 composed of the promoter and a RBS sequence, an NdeI and BamHI  
152 restriction sites to clone a gene of interest which can then be fused to a C-  
153 terminal 3x FLAG tag. To avoid any read-through transcription, the construct  
154 is flanked by terminator sequences. The expression constructs were cloned  
155 either into a one-copy vector or a five-copy vector, pBACe3.6 and pGHM491,  
156 respectively. The following nomenclature will be used: Bp1 to Bp6 represents  
157 the six promoters cloned into the single copy vector, lp1 to lp6 corresponds to  
158 the six promoters cloned into the five copy vector, the '-' and '+' represents  
159 the absence or the presence of a RBS, respectively, while the 'N' corresponds  
160 to the RBS composed of the GACT repeat in the p1 promoter.

161 We first determined the strength of each expression vector by inserting an  
162 *EGFP* gene in each vector to investigate by flow cytometry the amount of  
163 fluorescence produced (Figure S1B). To rank the expression vectors, we  
164 normalize their average fluorescence value against the strongest vector, lp6+  
165 (Figure 1B). Most of the one-copy expression vectors produce an amount of  
166 EGFP close to the detection threshold and therefore their ranking might not  
167 be representative. However, we can observe that the five-copy expression  
168 vectors produce more fluorescence than the one-copy vectors and that the  
169 vectors with a consensus RBS are also producing more fluorescence than the  
170 vectors without a RBS motif, except for the p1 promoter where the presence  
171 or absence of the RBS does not influence the amount of fluorescence  
172 produced. We confirmed the flow cytometry results for the strongest  
173 expression vectors expressing Hsmar1 by performing western blot with an

174 anti-Hsmar1 antibody (Figure 1C). We also compared by western blotting  
175 these constructs with the inducible promoter normally used for papillation  
176 assay, the pTac promoter (Figure 1D). Interestingly, two of our constructs  
177 (Ip5+ and Ip6+) produce a higher amount of Hsmar1 than the pTac promoter  
178 fully induced with 1 mM of IPTG.

179

### 180 **Characterization of the papillation assay with the wild-type Hsmar1** 181 **transposase**

182 To characterize the implementation of the constitutive promoters into the  
183 papillation assay, we used the wild-type Hsmar1 transposase as we have  
184 already well characterized its activity in papillation assay (18). We defined the  
185 transposition rate as the average number of papillae per colony after five days  
186 of incubation at 37°C. Bacterial cells stop dividing after a few days at 37°C  
187 because of carbon exhaustion, therefore affecting the number of visible  
188 papillae since late transposition events, i.e. a few divisions before the cells  
189 stop dividing because of carbon exhaustion, will not be visible because of the  
190 insufficient number of division. To overcome this limitation, we took advantage  
191 of the fact that bacterial cells having undergone a transposition event resulting  
192 in a fusion between a host gene and the lacZ gene, located in the transposon,  
193 will be able to use lactose as a carbon source. Thus, by adding lactose to the  
194 medium we should recover a higher number of papillae per colony since the  
195 lac<sup>+</sup> cells resulting from a late transposition event would be able to continue to  
196 grow by using lactose (Supplementary Figure 2). Indeed, by using the Ip3+  
197 expression vector and a range of lactose concentration, we observed a  
198 correlation between the number of papillae per colony and the lactose



199 concentration (Supplementary Figure 2A/ to C/). We decided to use a  
200 concentration of lactose of 0.1% for the papillation assay since it is  
201 representing the best trade-off between the number of papillae per colony and  
202 the size of the papillae to allow a proper quantitation at high transposition rate.  
203 We next investigated the transposition rate of each expression vector with the  
204 wild-type Hsmar1 transposase. Representative colony of the papillation assay  
205 for each Hsmar1 expression vectors is shown in Figure 2A and their  
206 respective whole plate pictures are shown in Supplementary Figure 3. As  
207 expected from the wide-range of expression, we observed a 200-fold variation  
208 in the average number of papillae per colony as the quantitation of the  
209 different expression vectors shows in Figure 2B. To better visualize the  
210 relationship between the expression vector strength and the transposition  
211 rate, determined by the number of papillae per colony, we plotted the vector  
212 strength determined by flow cytometry (Figure 1B) against the number of  
213 papillae per colony (Figure 2C). As previously published *in vitro*, in *E. coli* and  
214 in HeLa cells, the wild-type Hsmar1 transposase follows an inverse-  
215 exponential relationship between transposase expression and transposition  
216 rate (12, 22). Interestingly, the transposition rate peaks with the weakest  
217 promoters in the single copy vector indicating that the transposition rate is  
218 extremely sensitive to overproduction inhibition (OPI) resulting from a slight  
219 increase in the transposase concentration. However, for the expression  
220 vectors with a similar average promoter strength but a transposition rate  
221 below the highest one we cannot determine whether their suboptimal  
222 transposition rate is due to an insufficient amount of Hsmar1 transposase in  
223 the cell or OPI.

224 Importantly, the transposition assay also provides a more precise approach to  
225 investigate weak promoter strength than flow cytometry with EGFP. Indeed,  
226 out of the 18 expression vectors having a relative promoter strength around  
227 4% of Ip6+, the transposition assay shows a 10-fold change in transposition  
228 rate within this set of vectors (Figure 2C).

229

230 **Bounding covalently two Hsmar1 monomers in a dimer affects the**  
231 **transposition rate**

232 We recently published a new Hsmar1 construct where two monomers are  
233 covalently bound by a linker region (Figure 3A) (23). We use advantage of our  
234 approach to test whether the transposition rate of a covalently bound Hsmar1  
235 dimer differs to the Hsmar1 monomer. At low expression level, we expect a  
236 covalently bound Hsmar1 dimer to transpose more efficiently than an Hsmar1  
237 monomer because of the physical link in the covalent dimer, which keeps both  
238 monomers close to each other, and also because the covalent dimer requires  
239 a single translation event whereas the monomer requires two. We cloned the  
240 monomeric and dimeric construct in a set of expression vectors spanning from  
241 very low to high expression and performed a papillation assay.

242 Representative colony of the papillation assay of each expression vectors is  
243 shown in Figure 3B and their respective whole plate pictures are shown in  
244 Supplementary Figure 4. Interestingly, we observe a change in the number of  
245 papillae per colony with the lowest expression vectors, as shown by the  
246 quantitation in Figure 3C. When compared to the results obtained with  
247 Hsmar1 monomer, the covalent dimer transposition rate peaks at a different  
248 set of expression vectors, Bp2- and Bp3- for the covalent dimer and Ip2- and

249 Ip1+ for the monomer. These four expression vectors have a similar relative  
250 promoter strength, around 4% of Ip6+, indicating that the number of  
251 transposases expressed per cell is particularly low (see Discussion).  
252 Inversely, we do not observe any difference in the number of papillae per  
253 colony with stronger expression vectors such as Ip3+ and Ip6+ (Figure 3B to  
254 D). This indicates that a covalently bound Hsmar1 dimer is as sensitive to OPI  
255 as the monomer, which is also supported by the inverse relationship between  
256 the average promoter strength and the transposition rate for both the  
257 monomer and the covalent dimer (Figure 3D).

258

259 **SETMAR transposition activity was lost during the same period than**

260 **Hsmar1 transposase domestication**

261 The Hsmar1 transposase was originally found in the human genome where  
262 an Hsmar1 transposase with several mutations is fused to a SET domain to  
263 form SETMAR (24-26). The domesticated Hsmar1 transposase is inefficient at  
264 performing transposition because of the mutation of the last DDD triad  
265 catalytic motif to a DDN (25, 26). In addition to the D282N mutation, we  
266 performed a papillation assay with a non-induced pTac promoter the 22 other  
267 mutations present in the human SETMAR to determine their effects on  
268 Hsmar1 transposition (Figure 4A). Most of the mutations present in the human  
269 SETMAR occurred outside the DNA binding domain and happened at the  
270 same time as the domestication of the Hsmar1 transposase. Representative  
271 colony of the papillation assay of each expression vectors is shown in Figure  
272 4B and their respective whole plate pictures are shown in Supplementary  
273 Figure 5. In addition to D282N, two other mutations, C219A and S279L,

274 disrupt completely Hsmar1 transposition activity. Two other mutations located  
275 in the DNA binding domain, E2K and R53C, affect severely the transposition  
276 rate. In addition, seven other mutations located mostly in the catalytic domain  
277 mildly affect Hsmar1 transposition activity. Only one mutation, V201L,  
278 increases Hsmar1 transposition rate whereas the remaining mutations were  
279 neutral. Interestingly, nearly all deleterious mutations for transposition arose  
280 at the same time as the domestication of the Hsmar1 transposase.

281

## 282 **Mutations in Hsmar1 dimer interface produce hyperactive mutants in** 283 **bacteria**

284 The mutagenic nature of transposable elements make them useful in  
285 screening for essential genes. However, OPI limits the transposition rate  
286 when the transposase concentration is too high (12). One way to overcome  
287 OPI is to decrease the stability of the Hsmar1 dimer to shift the monomer-  
288 dimer equilibrium to the inactive monomeric form. We decided to take  
289 advantage of our approach to investigate two Hsmar1 transposases mutated  
290 in the dimer interface, one known mutant, F132A (F460 in SETMAR (27)) and  
291 a novel one R141L (9). We used three vectors expressing Hsmar1 at a low  
292 (Bp1+), optimal (Ip1+) and high (Ip6+) level. Representative colony of the  
293 papillation assay of each expression vectors is shown in Figure 4C and their  
294 respective whole plate pictures are shown in Supplementary Figure 6. The  
295 average number of papillae per colony is indicated below each representative  
296 colony. Interestingly, both F132A and R141L transposases are hyperactive at  
297 low and optimal levels of expression when compared to WT. A higher  
298 transposition rate is also observed at high expression level for both mutants,

299 with R141L showing a stronger resistance to OPI than F132A. To confirm the  
300 papillation assay, the mutants' transposition rate was also determined using  
301 the mating-out assay, a more quantitative assay measuring the transposition  
302 rate through the movement of the transposon reporter from its chromosomal  
303 location into a conjugative plasmid (Table 1). The results of the mating-out  
304 and transposition assays were similar. Interestingly, Hsmar1 R141L  
305 transposition rate is not affected by the high transposase expression level  
306 produced by Ip6+, as the rate remains similar between Ip1+ and Ip6+  
307 whereas we observe a 147 fold decrease for the wild type transposase and a  
308 17 fold decrease for the F132A mutant.  
309

| Construct  | Transposition frequency          | Mutant/W.T. |
|------------|----------------------------------|-------------|
| Ip1+ W.T.  | $4.73 (\pm 1.02) \times 10^{-5}$ |             |
| Ip1+ F132A | $9.73 (\pm 4.53) \times 10^{-4}$ | 21          |
| Ip1+ R141L | $2.42 (\pm 1.68) \times 10^{-4}$ | 5           |
| Ip6+ W.T.  | $3.22 (\pm 1.02) \times 10^{-7}$ |             |
| Ip6+ F132A | $5.79 (\pm 2.63) \times 10^{-5}$ | 180         |
| Ip6+ R141L | $3.24 (\pm 1.43) \times 10^{-4}$ | 1006        |

310 **Table 1: Transposition frequencies of two Hsmar1 transposase mutants**  
311 **expressed at optimal and high level.** The bacterial mating-out assays have been  
312 done with the RC5097 strain and the Ip1+ or Ip6+ vectors. Transposition frequencies  
313 are the average of three independent experiments  $\pm$  standard error of the mean.

314

315 **Discussion**

316 We present here an improvement of the papillation assay using a set of  
317 constitutive promoters cloned into a single- or five-copies vector in absence or  
318 presence of a RBS. This range of expression vectors give us a better control  
319 of the transposase expression compared to inducible vectors such as the  
320 pTac. This is illustrated in Figure 2C where we observe a large variation in the  
321 number of papillae per colony across expression vectors producing EGFP  
322 fluorescence close to the background level. This indicates that the  
323 transposition rate is extremely sensitive to small variation in transposase  
324 concentration, in agreement with previous works from our group (10, 12).

325

326 We recently published a covalently bound Hsmar1 construct, where a single  
327 transcription and translation event is sufficient to synthesize an active Hsmar1  
328 dimer (23). At low expression level, a change in the transposition rate is  
329 observed for the covalent dimer construct when compared to the monomeric  
330 construct whereas at higher expression level, the transposition rates are quite  
331 similar indicating that OPI is occurring for both the monomer and the covalent  
332 dimer Hsmar1 (Figure 3C and D). The change in transposition rate at low  
333 expression level is expected because a single translation event is needed for  
334 producing a covalently bound Hsmar1 dimer whereas the wild type Hsmar1  
335 requires two translation events for producing an active transposase. Based on  
336 this idea, we can hypothesize that Bp2- and Bp3-, which provides the highest  
337 transposition rates for the covalent dimer, corresponds to weaker promoters  
338 than Ip2- and Ip1+, which provides the highest transposition rates for the  
339 monomeric Hsmar1 but lower transposition rate for the covalent dimer. Thus,  
340 Bp2- and Bp3- are likely to express on average less than two proteins per cell,

341 which is not sufficient to optimally promote transposition for the Hsmar1  
342 monomer construct, whereas Ip2- and Ip1+ are likely to express on average  
343 at least two proteins per cell, which starts to promote OPI for the covalent  
344 dimer construct and therefore results in a lower transposition rate than Bp2-  
345 and Bp3-.

346

347 A peculiarity of the Hsmar1 transposase is the presence in anthropoid  
348 primates of SETMAR, a gene with new functions in gene regulation resulting  
349 from the fusion between a SET gene and an Hsmar1 transposase (24)  
350 (Tellier, M. and Chalmers, R., manuscript under review). It was shown that the  
351 domesticated Hsmar1 transposase DNA binding domain was under purifying  
352 selection whereas the catalytic domain was evolving under neutral selection,  
353 with a mutation of the last D of the catalytic triad DDD to an N abolishing  
354 SETMAR transposase activity (24-26). In addition to the mutation in the  
355 catalytic triad, the domesticated Hsmar1 contains 22 other mutations with  
356 three of them located in the DNA binding domain (E2K, R53C and D98N)  
357 (Figure 4A and B). Out of the 23 mutations, only one was found to increase  
358 the transposition rate in the papillation assay, V201L, whereas 12 mutations  
359 were deleterious for the transposition rate with three of them abolishing it  
360 completely (C219A, S279L and D282N). Interestingly, 11 of the 12 deleterious  
361 mutations occurred at the same time as Hsmar1 was domesticated, resulting  
362 in the abolition of SETMAR ability to promote transposition, and are therefore  
363 common to all anthropoid primates. Two of the DNA binding mutants, E2K  
364 and R53C, are deleterious to Hsmar1 transposition activity in a papillation  
365 assay. It will be interesting to determine whether this effect is mediated

366 through a change in ITR binding efficiency, which could have modified  
367 SETMAR's ability to bind ITRs in the genome and therefore its emerging  
368 functions in regulating gene expression.

369

370 Transposases have become an important and versatile biotechnological tool  
371 (28-30). The creation of hyperactive transposases can be advantageous over  
372 its wild-type counterpart as for transposon mutagenesis for example. One of  
373 the major mechanism limiting the transposition rate of *mariner* transposases is  
374 OPI, which is occurring when there is an excess of transposase dimer per  
375 transposon (11, 12). We previously show that mutating the conserved  
376 WVPHEL motif, which is part of the Hsmar1 transposase dimer interface,  
377 resulted in mostly hyperactive transposases (18, 31). Here we show that the  
378 mutation of the residues F132 and R141, which are located in the subunit  
379 interface (9, 27), also produces hyperactive transposases in *E. coli* with the  
380 R141L mutant being OPI-resistant (Figure 4C and Table 1). The hyperactivity  
381 of F132A and R141L mutants could be explained by the promotion of one of  
382 the conformational change essential for transposition (11). The decreased  
383 OPI-sensitivity could result from a decrease in the dimer stability, which shifts  
384 the monomer-dimer equilibrium towards the monomeric form, and therefore  
385 reduces the concentration of active transposases in the cell. Also, an unstable  
386 dimer bound to a transposon end could be more likely to fall apart allowing the  
387 recruitment of the previously bound end by another bound dimer, activating  
388 transposition. This type of mutant is more likely to be found hyperactive only  
389 in bacteria. Indeed, in mammalian cells the size of the nucleus and the bigger  
390 ratio of non-specific DNA to specific DNA, i.e. the transposon ends account



391 for a smaller fraction of the genome, will increase the time necessary for a  
392 transposase to find a transposon end. Therefore, transposases with a  
393 weakened dimer interface are more likely to revert to an inactive monomeric  
394 state resulting in hypoactive mutants.

395

396 An unexpected outcome of our range of expression vectors is the realization  
397 that the transposition rate could be used as a better approach than EGFP  
398 fluorescence to compare the strength of a series of weak promoters. This is  
399 illustrated in Figure 1B where 18 of our expression vectors have a relative  
400 promoter strength comprised between 3 and 4% of Ip6+, our strongest vector.  
401 However, in Figure 2C, we observe a 10-fold difference in the transposition  
402 rate between these 18 expression vectors. It is interesting to note that the  
403 seven expression vectors with the highest transposition rate (Figure 2C) are  
404 either based on the p1 promoter, which is a GACT track without promoter  
405 activity, or proper promoters but without a RBS site indicating that a stochastic  
406 Hsmar1 mRNA and/or protein production provides the highest transposition  
407 rate in *E. coli*. We previously shown that OPI starts to occur when two  
408 transposase dimers are present in a single cell (12). This therefore shows that  
409 the expression vectors with the highest transposition rate (Bp1-, Ip1+ and  
410 Bp5-) are the closest to the production of a single Hsmar1 dimer per cell  
411 across the bacterial colony. Thus, the papillation assay with the Hsmar1  
412 covalent dimer could be used to screen promoters to find a promoter  
413 expressing on average one protein per cell across a bacterial colony. The  
414 advantage of the papillation assay is that the transposition rate is quantified  
415 on multiple bacterial colonies which allows a comparison of the transposition

416 rate across a population of cells. We can therefore confidently differentiate  
417 between noise and real change in transposition efficiency due to OPI, as  
418 shown in Figure 2C.

419

## 420 **Conclusions**

421 We present in this study an improvement of the papillation assay using a set  
422 of constitutive promoters cloned in a one- or five-copies vector in presence or  
423 absence of a ribosome binding site. This set of expression vectors gives a  
424 better control of the transposase expression and the possibility to screen for  
425 hyperactive or OPI-resistant transposases by using one of the optimal or high  
426 expression vector, respectively. A potentially interesting approach to the  
427 synthetic biology community is an experimental method based on the  
428 covalently bound Hsmar1 transposase or the wild-type Hsmar1 that could be  
429 used for screening weak promoters to find a promoter expressing on average  
430 one or two proteins per cell, respectively.

431

## 432 **Methods**

### 433 **Media and bacterial strains**

434 Bacteria were grown in Luria-Bertani (LB) media at 37°C. The following  
435 antibiotics were used at the indicated concentrations: ampicillin (Amp), 100  
436 µg/ml, chloramphenicol (Cm), 25 µg/ml, and spectinomycin (Spec), 100  
437 µg/ml. The following Escherichia coli strains were used: RC5024 (identical to  
438 DH5α) [endA1 hsdR17 glnV44 thi-1 recA1 gyrA relA1 Δ(lacZYA-argF)U169  
439 deoR (φ80dlac Δ(lacZ)M15)], RC5094 [F- araD139 Δ(argF-lac)U169 rspL150  
440 relA1 flbB5301 fruA25 deoC1 ptsF25 rpoS359::Tn 10], RC5096 [F<sup>-</sup> fhuA2

441 Δ(lacZ)r1 glnV44 e14-(McrA-) trp-31 his-1 rpsL104 xyl-7 mtl-2 metB1 Δ(mcrC-  
442 mrr)114::*/S10 argE::Hsmar1-lacZ'-kanR*] and RC5097 (= RC5096  
443 pOX38::*miniTn10-CAT*).

444

#### 445 **Constitutive promoters**

446 Alper et al previously generated and characterized a set of constitutive  
447 promoters based on *pltetO* ranging from strong down to very weak (21). We  
448 select the promoters 00, jj, K, E, and W (equivalent to p2, p3, p4, p5, and p6  
449 in this study) and generate p1, a featureless tract of 44 GACT repeats which  
450 we represent an ideal promoter-less region (Table 1). Each promoter  
451 sequence is preceded by three terminator sequences and followed by a  
452 consensus or a null ribosome binding site (RBS) (and also a GACT RBS in  
453 the case of p1), a transposase gene, three Flag tag and a terminator  
454 sequence (Figure 1A).

455

| Promoter name | Sequence                                                                                                                                                                                                    | mRNA production value |
|---------------|-------------------------------------------------------------------------------------------------------------------------------------------------------------------------------------------------------------|-----------------------|
| p1            | CTGACTGACTGACTGACTGACTGACTGACTGACT<br>GACTGACTGACTGACTGACTGACTGACTGACTGACTG<br>ACTGACTGACTGACTGACTGACTGACTGACTGACTGAC<br>TGACTGACTGACTGACTGACTGACTGACTGACTGACTG<br>ACTGACTGACTGACTGACTGACTGACTGACTGACCATATG | n.d.                  |
| p2 (00)       | CAATCCGACGTCTAAGGAAACCATTATCATGACATCA<br>ACCTATAAAAATAGGCGTATCACGAGGCCCTCTCGTCT<br>CCACCTCAAGCTCCCTATCTAGTGATAGCGATTGACAT                                                                                   | 0.003                 |

|                     |                                                                                                                                                                                                             |       |
|---------------------|-------------------------------------------------------------------------------------------------------------------------------------------------------------------------------------------------------------|-------|
|                     | CCCTATCAGTGACGGAGATATTGAGCACATCAGCAGG<br>ACGCACTGACCACTTTAAGAAGGAGATATACATATG                                                                                                                               |       |
| p3 (JJ)             | CAATTCCGACGTCTAAGAAACCATTATTATCATGACATT<br>AACCTATAAAAATAGGCGTATCACGAGGCCCTTTCGTC<br>TTCACCTCGAGTCCCTATCAGTGATAGAGATTGACCTC<br>CCTATCAGTGATAGAGATACTGAGCACATCAGCAGGA<br>CGCACTGACCACTTTAAGAAGGAGATATACATATG | 0.159 |
| p4 (K)              | CAATTCCGACGTCTAAGAAACCATTATTATCATGACATT<br>AACCTATAAAAATAGGCGTATCACGAGGCCCTCTCGTC<br>TTCACCTCGAGTCCCTATCAGTGATAGGGATTGACATC<br>CCTATCAGTGATAGAGACTGGGCACATCAGCAGGA<br>CGCACTGACCACTTTAAGAAGGAGATATACATATG   | 0.299 |
| p5 (E)              | CAATTCCGACGCCTAAGAAACCATTATTATCATGACATT<br>AGCCTATAAAAATAGGCGTACCACGAGGCCCTTTCGTC<br>TTCACCTCGAGTCCCTATCAGTGATAGAGATTGACACC<br>CCTATCAGTGATAGAGATACTGAGCACATCAGCAGGA<br>CGCACTGACCACTTTAAGAAGGAGATATACATATG | 0.743 |
| p6 (W /<br>pI tetO) | CAATTCCGACGTCTAAGAAACCATTATTATCATGACATT<br>AACCTATAAAAATAGGCGTATCACGAGGCCCTTTCGTC<br>TTCACCTCGAGTCCCTATCAGTGATAGAGATTGACATC<br>CCTATCAGTGATAGAGATACTGAGCACATCAGCAGGA<br>CGCACTGACCACTTTAAGAAGGAGATATACATATG | 1     |

456 **Table 2: List of constitutive promoters.**

457 Nomenclature (the letters indicated between brackets are from (21)), sequence, and  
458 strength of the constitutive promoters used in this study. n.d.: not determined.

459

460 **Flow cytometry**

461 RC5096 cells expressing EGFP were grown overnight at 37°C in LB medium  
462 supplemented with chloramphenicol or spectinomycin. The cultures were  
463 diluted in a 1:1000 ratio in fresh LB medium complemented with antibiotics  
464 and grown to mid-log phase ( $OD_{600} \sim 0.5$ ). The cells were pelleted at 6,000g  
465 for 5 min, washed in 1X PBS twice, and resuspended in 500  $\mu$ l of 1X PBS.  
466 Flow cytometry analysis was performed on 100,000 cells with a Beckman  
467 Coulter Astrios EQ.

468

#### 469 **Western blotting**

470 Cells containing a derivative of pMAL-c2x were grown in LB supplemented  
471 with 100  $\mu$ g/ml of ampicillin at 37°C until an  $OD_{600}$  of  $\sim 0.5$  and were then  
472 induced with the required concentration of IPTG for 2 hours at 37°C. Cells  
473 containing pGHM491 or pBACe3.6 derivatives were grown in LB  
474 supplemented with respectively 100  $\mu$ g/ml of spectinomycin or 50  $\mu$ g/ml of  
475 chloramphenicol at 37°C for the same amount of time as the induced cells.  
476 Promoters' expression were analyzed by pelleting  $\sim 1.5 \times 10^9$  cells. The  
477 samples were resuspended in SDS sample buffer, boiled for 5 min, and  
478 loaded on 10% SDS-PAGE gels. Proteins were transferred to PVDF  
479 membrane, probed with an anti-Hsmar1 antibody (goat polyclonal, 1:500  
480 dilution, ab3823, Abcam) followed by a horseradish peroxidase-conjugated  
481 anti-goat secondary antibody (rabbit polyclonal, 1:5000 dilution, ab6741,  
482 Abcam). Proteins were visualized by using the ECL system (Promega) and  
483 Fuji medical X-ray film (Fujifilm).

484

#### 485 **Papillation assay**

486 The papillation assay and the reporter strain RC5096 have been described  
487 previously (Figure S1A) (18). Briefly, transposase expression vectors were  
488 transformed into the RC5096 strain. It is a  $lac^-$  *E. coli* strain encoding a  
489 transposon containing a promoter-less *lacZ* and a kanamycin resistance gene  
490 flanked with Hsmar1 ends, which has been integrated in a silent genomic  
491 locus. In absence of *LacZ*, the strain produces white colonies on X-gal  
492 indicator plates. When the transposase is supplied in trans, the integration of  
493 a transposon into the correct reading frame of an active gene will produce a  
494 *lacZ* fusion protein. The descendants of this cell will become visible as blue  
495 papillae on X-gal indicator plates. RC5096 transformants were plated on LB-  
496 agar medium supplemented with 0.01% lactose, 40  $\mu\text{g/ml}$  of X-gal and either  
497 50  $\mu\text{g/ml}$  of chloramphenicol or 100  $\mu\text{g/ml}$  of spectinomycin. Plates were  
498 incubated 5 days at 37°C and photographed. The transposition rate is  
499 determined by the number of papillae per colony or by the rate of appearance  
500 of papillae on the colonies.

501

### 502 **Mating-out assay**

503 A chloramphenicol resistant derivative of the conjugative plasmid pOX38 has  
504 been introduced in the RC5096 papillation strains to create the donor strains  
505 RC5097. Briefly, RC5097 transformants and the recipient strain, RC5094,  
506 were grown overnight in LB supplemented with antibiotics at 37°C. The next  
507 day, respectively one and three volumes of RC5097 and RC5094 were  
508 centrifuged for 5 min at 6,000x g. Each pellet was resuspended in 3 ml of  
509 fresh LB, pool together, and incubated in a shaking water bath for 3 hours at  
510 37°C. After the mating, the transposition events were detected by plating 200

511  $\mu$ l of each culture on LB-agar medium supplemented with tetracycline and  
512 kanamycin. The number of transconjugants was obtained by plating a  $10^{-5}$   
513 fold dilution of each culture on LB-agar medium supplemented with  
514 tetracycline and chloramphenicol. The plates were incubated overnight at  
515 37°C and the transposition rate determined the next day by dividing the  
516 number of kanamycin-resistant cells by the number of chloramphenicol  
517 resistant cells.

518

### 519 **Funding**

520 This work was supported by a Wellcome Trust Grant [WT093160] to RC and a  
521 Biotechnology and Biological Sciences Research Council Doctoral Training  
522 Program Grant [BB/J014508/1] to MT

523

### 524 **Availability of data and materials**

525 All data generated or analyzed during this study are included in this published  
526 article and its Additional files.

527

### 528 **Competing interests**

529 The authors declare that they have no competing interests.

530

### 531 **Authors' contributions**

532 MT and RC designed the study. MT performed the experiments, analyzed the  
533 data and wrote the manuscript. All authors read and approved the final  
534 manuscript.

535

## 536 References

- 537 1. Lander ES, Linton LM, Birren B, Nusbaum C, Zody MC, Baldwin J, et  
538 al. Initial sequencing and analysis of the human genome. *Nature*.  
539 2001;409(6822):860-921.
- 540 2. Feschotte C, Pritham EJ. DNA transposons and the evolution of  
541 eukaryotic genomes. *Annu Rev Genet*. 2007;41:331-68.
- 542 3. Aziz RK, Breitbart M, Edwards RA. Transposases are the most  
543 abundant, most ubiquitous genes in nature. *Nucleic Acids Res*.  
544 2010;38(13):4207-17.
- 545 4. Orgel LE, Crick FH. Selfish DNA: the ultimate parasite. *Nature*.  
546 1980;284(5757):604-7.
- 547 5. Chuong EB, Elde NC, Feschotte C. Regulatory activities of  
548 transposable elements: from conflicts to benefits. *Nat Rev Genet*.  
549 2017;18(2):71-86.
- 550 6. Piriyaongsa J, Jordan IK. A family of human microRNA genes from  
551 miniature inverted-repeat transposable elements. *PLoS One*. 2007;2(2):e203.
- 552 7. Kapusta A, Kronenberg Z, Lynch VJ, Zhuo X, Ramsay L, Bourque G, et  
553 al. Transposable elements are major contributors to the origin, diversification,  
554 and regulation of vertebrate long noncoding RNAs. *PLoS Genet*.  
555 2013;9(4):e1003470.
- 556 8. Jangam D, Feschotte C, Betran E. Transposable Element  
557 Domestication As an Adaptation to Evolutionary Conflicts. *Trends Genet*.  
558 2017;33(11):817-31.
- 559 9. Tellier M, Bouuaert CC, Chalmers R. Mariner and the ITm Superfamily  
560 of Transposons. *Microbiol Spectr*. 2015;3(2):MDNA3-0033-2014.
- 561 10. Claeys Bouuaert C, Chalmers R. Transposition of the human Hsmar1  
562 transposon: rate-limiting steps and the importance of the flanking TA  
563 dinucleotide in second strand cleavage. *Nucleic Acids Res*. 2010;38(1):190-  
564 202.
- 565 11. Claeys Bouuaert C, Walker N, Liu D, Chalmers R. Crosstalk between  
566 transposase subunits during cleavage of the mariner transposon. *Nucleic  
567 Acids Res*. 2014;42(9):5799-808.
- 568 12. Claeys Bouuaert C, Lipkow K, Andrews SS, Liu D, Chalmers R. The  
569 autoregulation of a eukaryotic DNA transposon. *Elife*. 2013;2:e00668.
- 570 13. Dawson A, Finnegan DJ. Excision of the *Drosophila* mariner  
571 transposon Mos1. Comparison with bacterial transposition and V(D)J  
572 recombination. *Mol Cell*. 2003;11(1):225-35.
- 573 14. Auge-Gouillou C, Brillet B, Hamelin MH, Bigot Y. Assembly of the  
574 mariner Mos1 synaptic complex. *Mol Cell Biol*. 2005;25(7):2861-70.
- 575 15. Richardson JM, Dawson A, O'Hagan N, Taylor P, Finnegan DJ,  
576 Walkinshaw MD. Mechanism of Mos1 transposition: insights from structural  
577 analysis. *EMBO J*. 2006;25(6):1324-34.
- 578 16. Lohe AR, Hartl DL. Autoregulation of mariner transposase activity by  
579 overproduction and dominant-negative complementation. *Mol Biol Evol*.  
580 1996;13(4):549-55.
- 581 17. Lampe DJ. Bacterial genetic methods to explore the biology of mariner  
582 transposons. *Genetica*. 2010;138(5):499-508.



- 583 18. Liu D, Chalmers R. Hyperactive mariner transposons are created by  
584 mutations that disrupt allosterism and increase the rate of transposon end  
585 synapsis. *Nucleic Acids Res.* 2014;42(4):2637-45.
- 586 19. Huisman O, Kleckner N. A new generalizable test for detection of  
587 mutations affecting Tn10 transposition. *Genetics.* 1987;116(2):185-9.
- 588 20. Pajunen MI, Rasila TS, Happonen LJ, Lamberg A, Haapa-Paananen S,  
589 Kiljunen S, et al. Universal platform for quantitative analysis of DNA  
590 transposition. *Mob DNA.* 2010;1(1):24.
- 591 21. Alper H, Fischer C, Nevoigt E, Stephanopoulos G. Tuning genetic  
592 control through promoter engineering. *Proc Natl Acad Sci U S A.*  
593 2005;102(36):12678-83.
- 594 22. Blundell-Hunter G, Tellier M, Chalmers R. Transposase subunit  
595 architecture and its relationship to genome size and the rate of transposition  
596 in prokaryotes and eukaryotes. *Nucleic Acids Res.* 2018.
- 597 23. Claeys Bouuaert C, Chalmers R. A single active site in the mariner  
598 transposase cleaves DNA strands of opposite polarity. *Nucleic Acids Res.*  
599 2017;45(20):11467-78.
- 600 24. Cordaux R, Udit S, Batzer MA, Feschotte C. Birth of a chimeric primate  
601 gene by capture of the transposase gene from a mobile element. *Proc Natl*  
602 *Acad Sci U S A.* 2006;103(21):8101-6.
- 603 25. Liu D, Bischerour J, Siddique A, Buisine N, Bigot Y, Chalmers R. The  
604 human SETMAR protein preserves most of the activities of the ancestral  
605 Hsmar1 transposase. *Mol Cell Biol.* 2007;27(3):1125-32.
- 606 26. Miskey C, Papp B, Mates L, Sinzelle L, Keller H, Izsvak Z, et al. The  
607 ancient mariner sails again: transposition of the human Hsmar1 element by a  
608 reconstructed transposase and activities of the SETMAR protein on  
609 transposon ends. *Mol Cell Biol.* 2007;27(12):4589-600.
- 610 27. Goodwin KD, He H, Imasaki T, Lee SH, Georgiadis MM. Crystal  
611 structure of the human Hsmar1-derived transposase domain in the DNA  
612 repair enzyme Metnase. *Biochemistry.* 2010;49(27):5705-13.
- 613 28. Atkinson H, Chalmers R. Delivering the goods: viral and non-viral gene  
614 therapy systems and the inherent limits on cargo DNA and internal  
615 sequences. *Genetica.* 2010;138(5):485-98.
- 616 29. Frokjaer-Jensen C, Davis MW, Sarov M, Taylor J, Flibotte S, LaBella  
617 M, et al. Random and targeted transgene insertion in *Caenorhabditis elegans*  
618 using a modified Mos1 transposon. *Nat Methods.* 2014;11(5):529-34.
- 619 30. Gayle S, Pan Y, Landrette S, Xu T. piggyBac insertional mutagenesis  
620 screen identifies a role for nuclear RHOA in human ES cell differentiation.  
621 *Stem Cell Reports.* 2015;4(5):926-38.
- 622 31. Bouuaert CC, Tellier M, Chalmers R. One to rule them all: A highly  
623 conserved motif in mariner transposase controls multiple steps of  
624 transposition. *Mob Genet Elements.* 2014;4(1):e28807.
- 625

## 626 **Legends**

### 627 **Figure 1. Characterization of the constitutive promoters.**

628 **A/** The gene of interest, Hsmar1 in this case, is fused to 3x FLAG tag on its  
629 C-terminus and cloned downstream of one of six different promoters (see text  
630 for more details) with a ribosome binding site (RBS) present or not. The  
631 construct is located between terminator sequences (T) upstream and  
632 downstream to avoid read-through transcription. To further control the number  
633 of copies, the plasmid backbone is a one-copy, pBACe3.6, or five copies,  
634 pGMH491, vector.

635 **B/** The promoter strength of each construct were determined by FACS after  
636 cloning an eGFP gene in each vector. The number 1 to 6 corresponds to one  
637 of the six different promoters. The single and five-copies vectors are  
638 annotated B or I, respectively. The vector without or with a consensus RBS  
639 contained a – or +, respectively. For the promoter 1, which is a repeat of the  
640 GACT motif, the RBS motif can also corresponds to a GACT motif and is  
641 named N (Bp1N and Ip1N). n=3.

642 **C/** Comparison of Hsmar1 expression cloned in the strongest promoters by  
643 western blotting using an antibody against the C-terminus of Hsmar1.

644 **D/** Comparison by western blotting of the strongest constitutive promoters  
645 against pTac promoter induced with different concentration of IPTG.

646

647 **Figure 2. Characterization of the modified papillation assay with the**  
648 **wild-type Hsmar1 transposase.**

649 **A/** Representative colony of each vector expressing a wild-type Hsmar1  
650 transposase. Whole plate pictures are presented in Supplementary Figure 3.

651 **B/** Quantification of the number of papillae per colony. Average  $\pm$  standard  
652 deviation of the mean of six representative colonies from three independent  
653 experiments.

654 **C/** Plot of the average promoter strength (as defined in Figure 1B) versus the  
655 average number of papillae per colony (as defined in Figure 2B). As expected  
656 from the overproduction inhibition (OPI) mechanism, an inverse power law is  
657 observed between the promoter strength and the transposition rate.

658

659 **Figure 3. Expression of a covalent Hsmar1 transposase affects the**  
660 **expression threshold needed to reach OPI.**

661 **A/** Schematic of the Hsmar1 monomer or covalent dimer. The difference  
662 between both constructs is the insertion of a stop codon upstream of the linker  
663 region in the monomer construct.

664 **B/** Representative colony of each vector expressing either an Hsmar1  
665 monomer or covalent dimer transposase. Whole plate pictures are presented  
666 in Supplementary Figure 4.

667 **C/** Quantification of the number of papillae per colony. The expression vectors  
668 have been ordered by decreasing number of papillae per colony for the  
669 Hsmar1 monomer. Average  $\pm$  standard deviation of the mean of six  
670 representative colonies from three independent experiments.

671 **D/** Plot of the average promoter strength (as defined in Figure 1B) versus the  
672 average number of papillae per colony (as defined in Figure 3C).

673

674 **Figure 4. Characterization by the papillation assay of different Hsmar1**  
675 **mutants.**

676 **A/** Phylogenetic tree of anthropoid primates representing the apparition of  
677 mutations in the Hsmar1 domain of SETMAR. All the mutations present in the  
678 human SETMAR were tested by papillation assay to determine when  
679 deleterious mutations for Hsmar1 transposition appeared.

680 **B/** Representative colony of pMAL-C2X expressing wild-type or mutant  
681 Hsmar1 transposase. Whole plate pictures are presented in Supplementary  
682 Figure 5.

683 **C/** Different Hsmar1 mutants have been tested in low, optimal and high  
684 transposase expression level (Bp1+, Ip1+ and Ip6+, respectively).

685 Representative colony of each papillation plate is shown. The average  
686 number of papillae per colony is indicated below the pictures. Whole plate  
687 pictures are presented in Supplementary Figure 6.

688

#### 689 **SF1. Representation of the modified papillation assay.**

690 **A/** The Hsmar1 (RC5096), which encodes a promoter-less *lacZ* gene and a  
691 kanamycin resistance marker, has been integrated at a transcriptionally silent  
692 locus in a lac- *E. coli* strain. In absence of transposase, the *lacZ* gene is not  
693 expressed therefore the strain produces white colonies on X-gal reporter  
694 plates. When the transposase is supplied in trans from a vector, if a  
695 transposon integrates into the ORF of a transcribed gene, a *lacZ* fusion  
696 protein will be produced. The cell's descendants will expressed LacZ and  
697 therefore will appear as blue papillae on X-gal reporter plates. Black arrow,  
698 promoter; open brackets, transposon ends; empty rectangle, transposase  
699 gene.

700 For the mating-out assay, a chloramphenicol resistant derivative of the  
701 conjugative plasmid pOX38 is introduced into the reporter strain.  
702 Transposition of the reporter into the plasmid is detected by selecting  
703 transconjugants after mating with a recipient strain on chloramphenicol and  
704 kanamycin.

705 **B/** Example of FACS profile for each constitutive promoter expressing the  
706 eGFP gene. Ip0 is the negative control with nothing cloned in the vector.

707

### 708 **SF2. Effect of lactose on the modified papillation assay.**

709 **A/** Representative colony of the Ip3+ Hsmar1 vector on different concentration  
710 of lactose. Whole plate pictures are presented in C/.

711 **B/** Quantification of the number of papillae per colony. Average  $\pm$  standard  
712 deviation of the mean of six representative colonies from three independent  
713 experiments.

714 **C/** Whole plate pictures of the representative colony presented in  
715 Supplementary Figure 2A.

716

### 717 **SF3. Characterization of the modified papillation assay with the wild- 718 type Hsmar1 transposase.**

719 Whole plate pictures of the representative colony presented in Figure 2A.

720

### 721 **SF4. Expression of a covalent Hsmar1 transposase affects the 722 expression threshold needed to reach OPI.**

723 Whole plate pictures of the representative colony presented in Figure 3A.

724

725 **SF5. Characterization by the papillation assay of different Hsmar1**

726 **mutants.**

727 Whole plate pictures of the representative colony presented in Figure 4B.

728

729 **SF6. Characterization by the papillation assay of different Hsmar1**

730 **mutants.**

731 Whole plate pictures of the representative colony presented in Figure 4C.

732

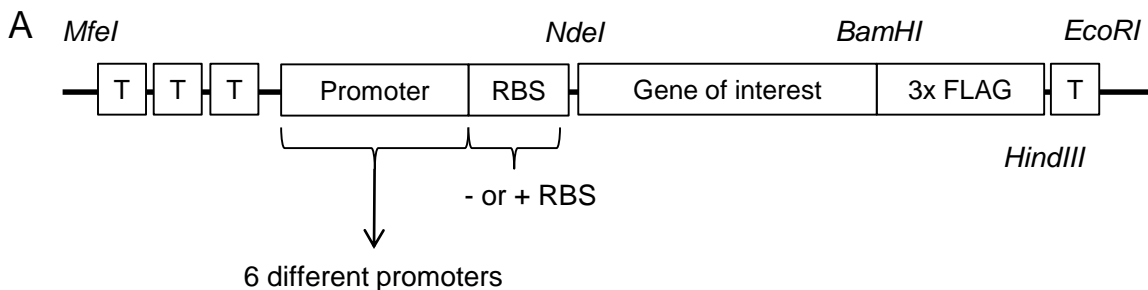

Construct in pBAC (1 copy per cell) and pIncQ (5 copies per cell)

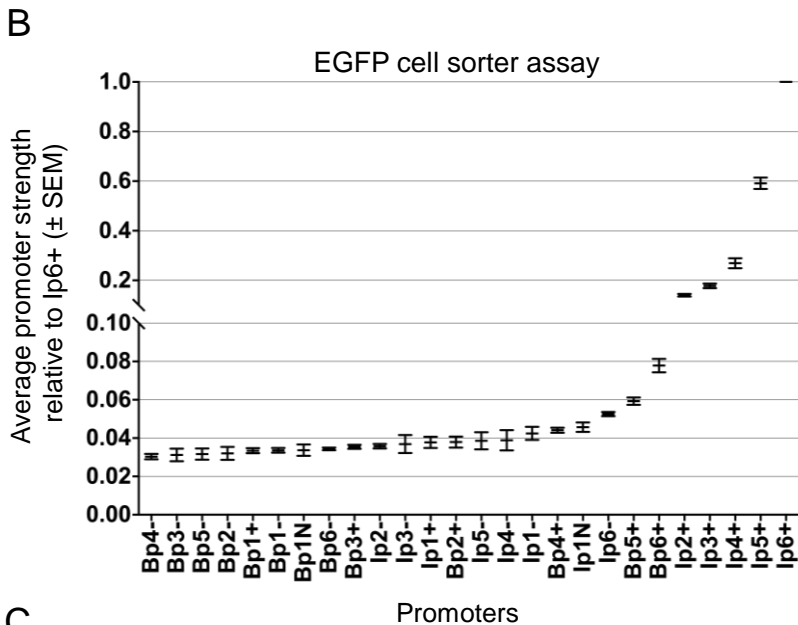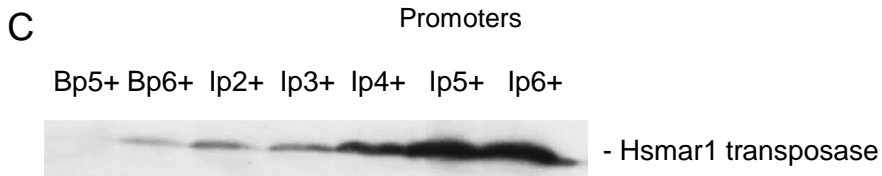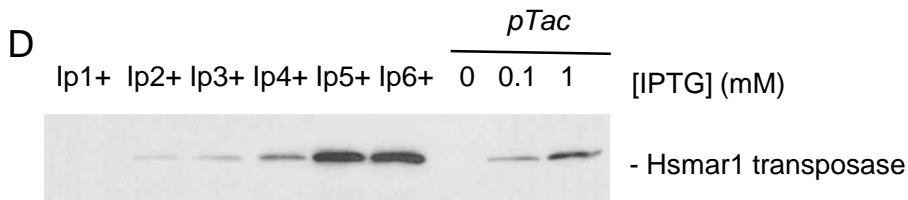

Figure 1

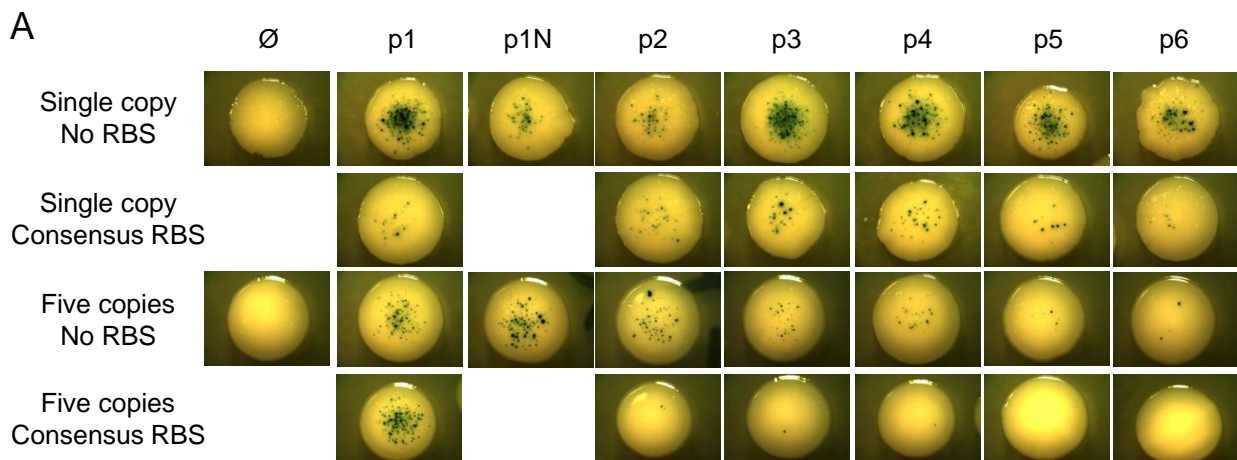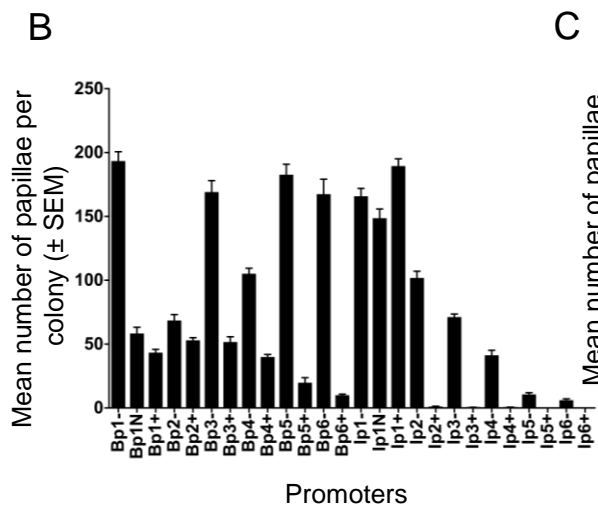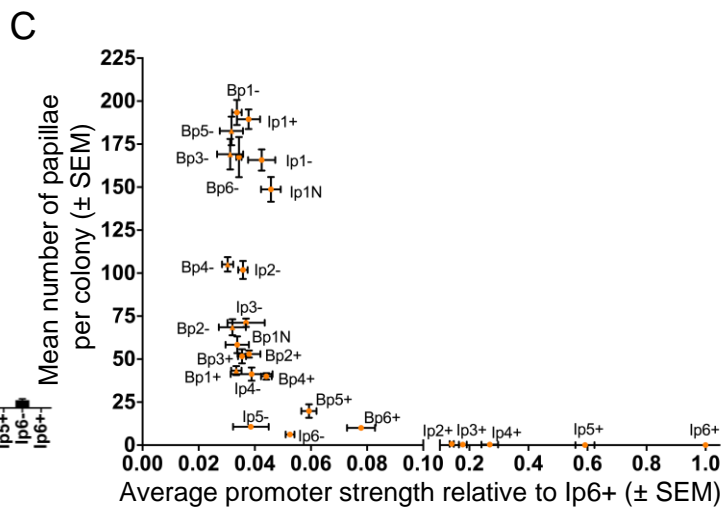

Figure 2



### A Covalent dimer constructs:

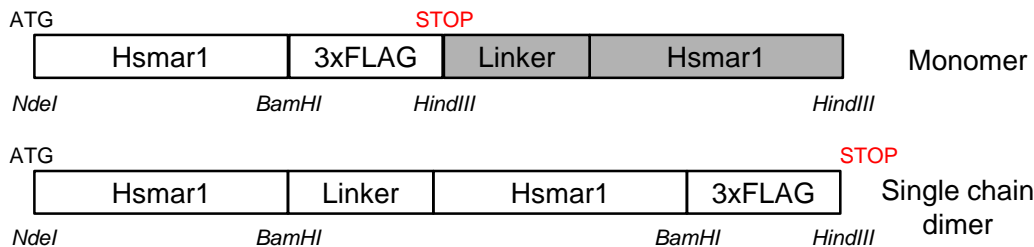

### B

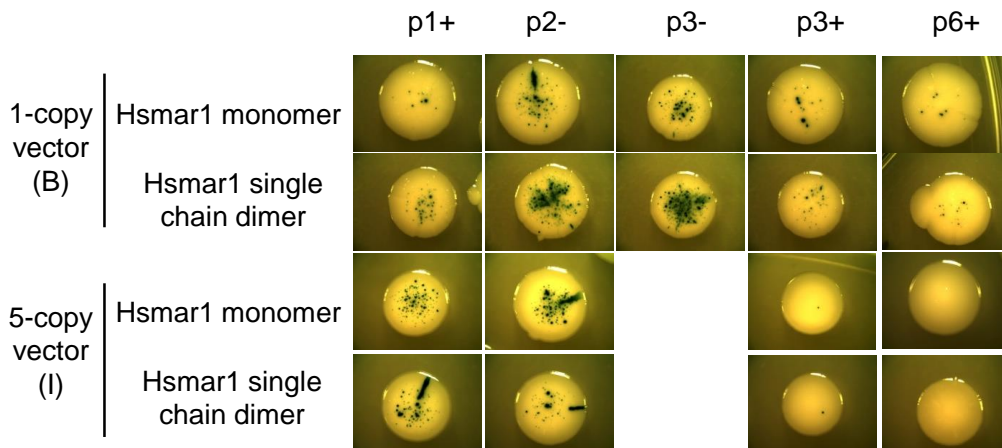

### C

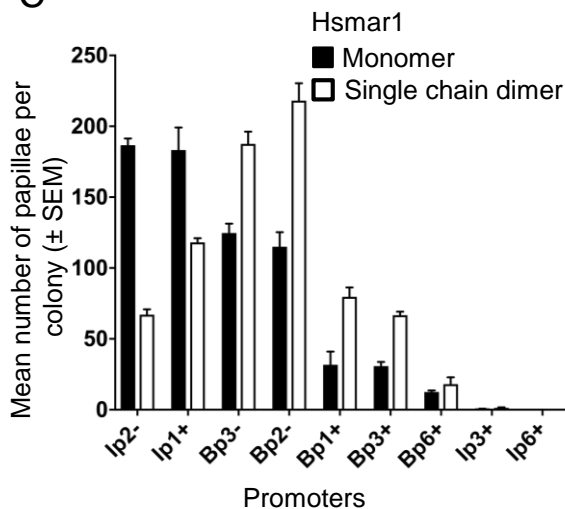

### D

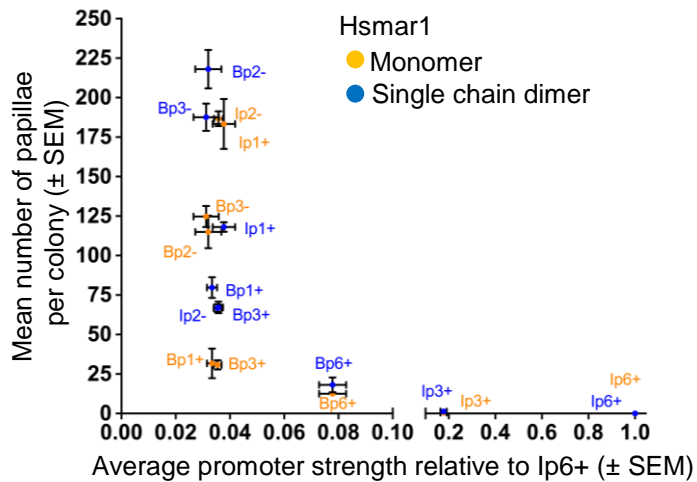

Figure 3

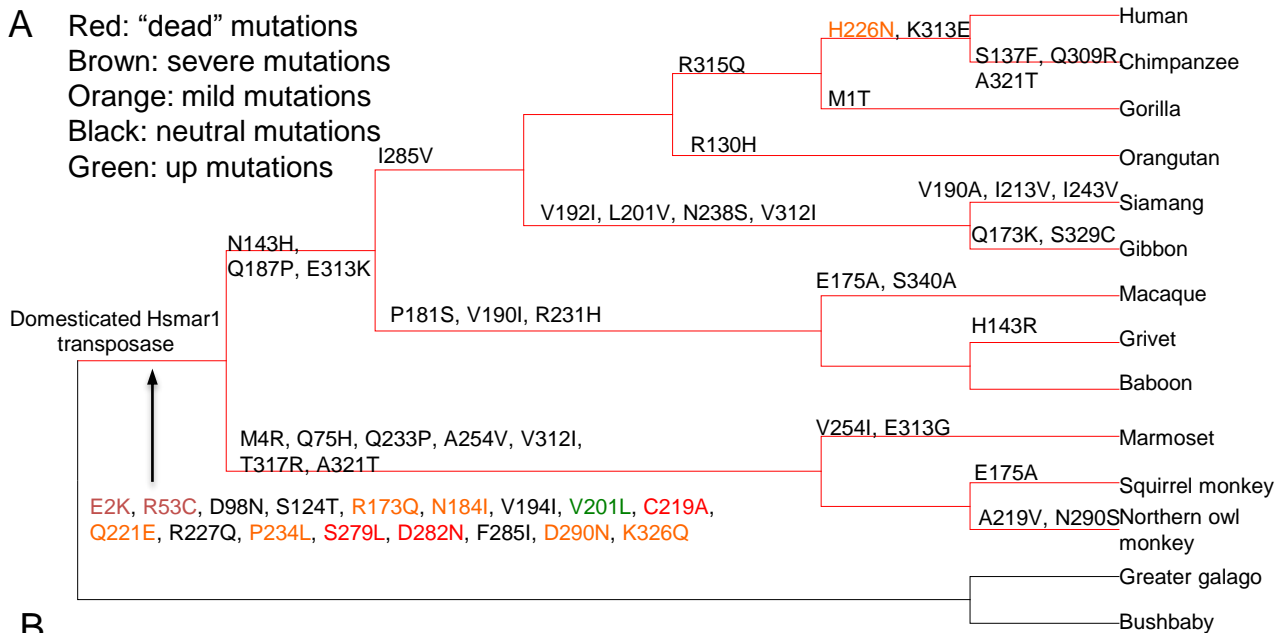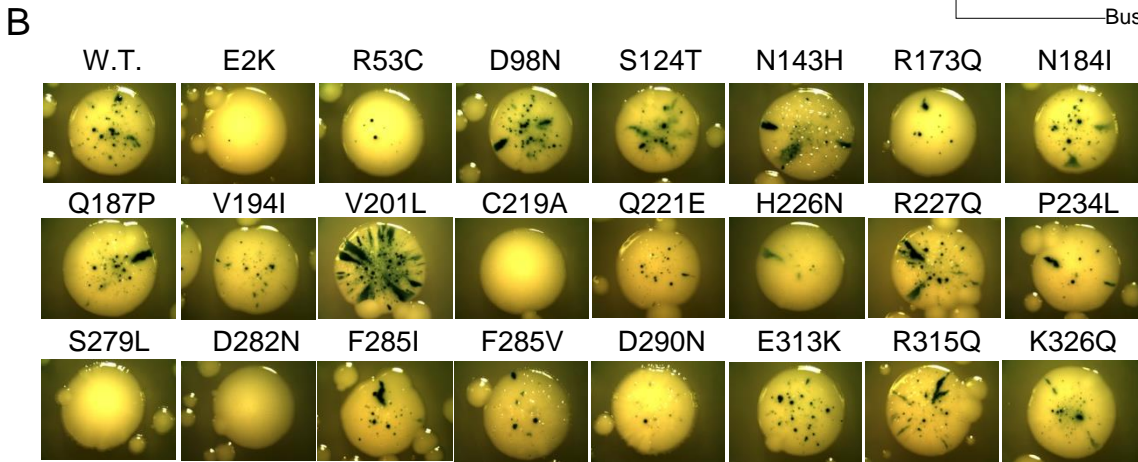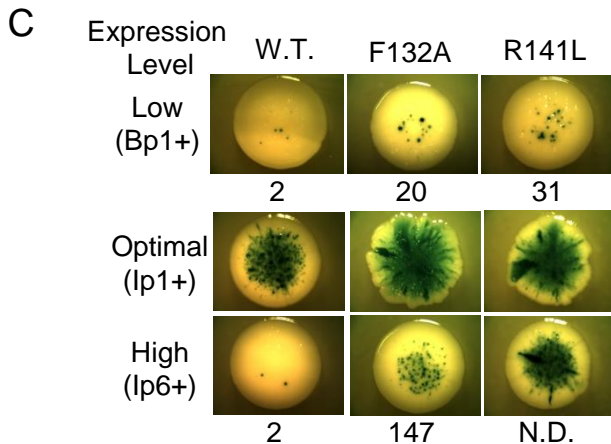

Figure 4
